# Supplementary material
Source: HighWire-hosted journal article supplement (https://bmjopen.bmj.com/content/15/1/e088486)
Supplement: inline-supplementary-material-4 [file inline-supplementary-material-4.pdf]

Supp. Table 1: The distribution of participants by frequency clusters

| Symptom frequency clusters | Subclusters of symptom frequency | Overall    | Control    | RA         | IBD       | SpA       | Other-IMIDs | Psoriasis |
|----------------------------|----------------------------------|------------|------------|------------|-----------|-----------|-------------|-----------|
| Poly-symptomatic           | Higher n (%)                     | 101 (5.3)  | 72 (6.2)   | 7 (3.1)    | 5 (2.8)   | 7 (4.9)   | 6 (4.9)     | 4 (4.5)   |
|                            | Lower n (%)                      | 85 (4.5)   | 44 (3.8)   | 5 (2.2)    | 15 (8.4)  | 5 (3.5)   | 7 (5.7)     | 9 (10.1)  |
| Intermediate Symptomatic   | Higher n (%)                     | 412 (21.6) | 280 (24.3) | 29 (12.8)  | 46 (25.8) | 23 (16.2) | 20 (16.4)   | 14 (15.7) |
|                            | Lower n (%)                      | 259 (13.6) | 112 (9.7)  | 56 (24.8)  | 29 (16.3) | 25 (17.6) | 29 (23.8)   | 8 (9.0)   |
| Oligo-/Asymptomatic        | Higher n (%)                     | 283 (14.8) | 207 (18.0) | 17 (7.5)   | 19 (10.7) | 14 (9.9)  | 13 (10.7)   | 13 (14.6) |
|                            | Lower n (%)                      | 769 (40.3) | 437 (37.9) | 112 (49.6) | 64 (36.0) | 68 (47.9) | 47 (38.5)   | 41 (46.1) |

Data are presented as absolute number (n) with proportion (%). IBD: inflammatory bowel disease, IMIDs: immune mediated inflammatory diseases, RA: rheumatoid arthritis, SpA: spondyloarthritis.

Supp. Table 2: Standardized residuals by diagnosis

|                          |           | Higher subcluster |              |               | Lower subcluster |              |               |
|--------------------------|-----------|-------------------|--------------|---------------|------------------|--------------|---------------|
| Main cluster             | Diagnosis | observed (n)      | expected (n) | Std. Residual | observed (n)     | expected (n) | Std. Residual |
| Polysymptomatic          | Control   | 72                | 60.95        | 2.31          | 44               | 51.29        | -1.65         |
|                          | RA        | 7                 | 11.96        | -1.57         | 5                | 10.06        | -1.74         |
|                          | SpA       | 7                 | 7.51         | -0.20         | 5                | 6.32         | -0.56         |
|                          | Psoriasis | 4                 | 4.71         | -0.34         | 9                | 3.96         | 2.65          |
|                          | IBD       | 5                 | 9.42         | -1.55         | 15               | 7.93         | 2.70          |
|                          | Other     | 6                 | 6.45         | -0.19         | 7                | 5.43         | 0.71          |
| Intermediate Symptomatic | Control   | 280               | 248.62       | 3.57          | 112              | 156.30       | -6.05         |
|                          | RA        | 29                | 48.78        | -3.41         | 56               | 30.66        | 5.24          |
|                          | SpA       | 23                | 30.65        | -1.62         | 25               | 19.27        | 1.46          |
|                          | Psoriasis | 14                | 19.21        | -1.37         | 8                | 12.07        | -1.29         |
|                          | IBD       | 46                | 38.42        | 1.45          | 29               | 24.15        | 1.11          |
|                          | Other     | 20                | 26.33        | -1.44         | 29               | 16.55        | 3.40          |
| Oligo-/Asymptomatic      | Control   | 207               | 170.78       | 4.77          | 437              | 464.06       | -2.58         |
|                          | RA        | 17                | 33.50        | -3.29         | 112              | 91.04        | 3.03          |
|                          | SpA       | 14                | 21.05        | -1.73         | 68               | 57.20        | 1.92          |
|                          | Psoriasis | 13                | 13.19        | -0.06         | 41               | 35.85        | 1.14          |
|                          | IBD       | 19                | 26.39        | -1.64         | 64               | 71.70        | -1.24         |
|                          | Other     | 13                | 18.09        | -1.34         | 47               | 49.15        | -0.41         |

Data are presented as absolute number (n). IBD: inflammatory bowel disease, IMIDs: immune mediated inflammatory diseases, RA: rheumatoid arthritis, SpA: spondyloarthritis.

Supp. Table 3: The distribution of participants according to treatment groups by frequency clusters

| Symptom frequency clusters | Subclusters of symptom frequency | csDMARD   | bDMARD     | tsDMARD  | Glucocorticoid |
|----------------------------|----------------------------------|-----------|------------|----------|----------------|
| Polysymptomatic            | Higher<br>n (%)                  | 6 (5.9)   | 20 (19.2)  | 0 (0.0)  | 3 (3.0)        |
|                            | Lower<br>n (%)                   | 9 (10.6)  | 21 (24.7)  | 1 (1.2)  | 10 (11.8)      |
| Intermediate Symptomatic   | Higher<br>n (%)                  | 25 (6.1)  | 96 (23.3)  | 4 (1.0)  | 21 (5.1)       |
|                            | Lower<br>n (%)                   | 58 (22.4) | 69 (26.6)  | 0 (0.0)  | 36 (13.9)      |
| Oligo-/Asymptomatic        | Higher<br>n (%)                  | 23 (8.1)  | 48 (17.0)  | 1 (0.4)  | 18 (6.4)       |
|                            | Lower<br>n (%)                   | 96 (12.5) | 184 (23.9) | 11 (1.4) | 53 (6.9)       |

Data are presented as absolute number (n) with proportion (%).bDMARDs: biologic disease-modifying anti-rheumatic drugs, csDMARDs: conventional synthetic disease-modifying anti-rheumatic drugs, tsDMARDs: target synthetic disease-modifying anti-rheumatic drugs.

**Supplementary Figure 1-legend:**

Standardized residuals by diagnosis (through analysing systemic autoimmune diseases, i.e. systemic lupus erythematosus, autoimmune inflammatory myopathies and systemic sclerosis in a common category)

**Supplementary Figure 2-legend:**

Standardized residuals that summarize the difference between observed and expected number of individuals in each cluster. Values lower than  $<-2$  or higher than  $>2$  were interpreted as an important deviation from the expected counts.

Figure 2A: Standardized residuals by csDMARDs, b-tsDMARDs

Figure 2B: Standardized residuals by glucocorticoid treatment: Standardized residuals with medication subgroups showed no association between symptom clusters.

**Supplementary Figure 3-legend:**

Standardized residuals by treatment subgroups
