# Supplementary material
Source: HighWire-hosted journal article supplement (https://bmjopen.bmj.com/content/15/1/e088486)

### Polysymptomatic

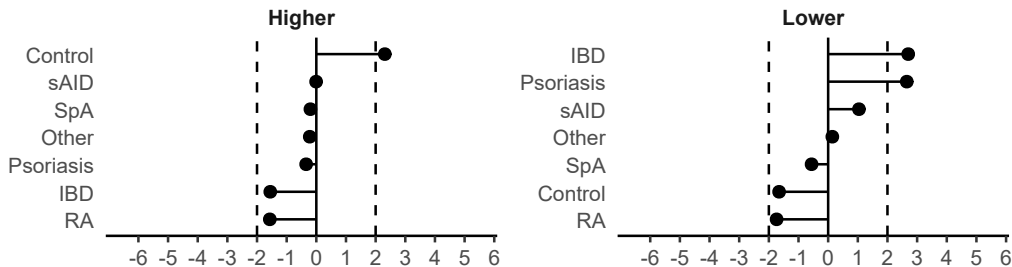

### Intermediate Symptomatic

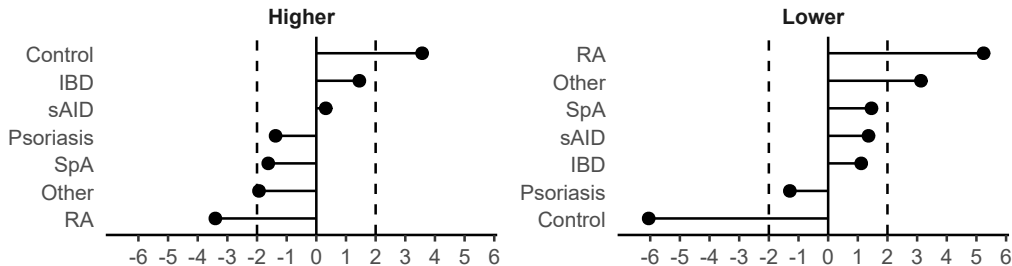

### Oligo-/Asymptomatic

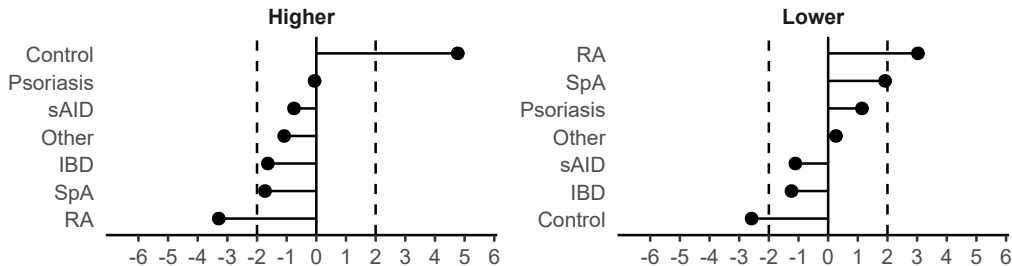

Standardized residuals

Supplement: inline-supplementary-material-5 [file inline-supplementary-material-5.pdf]

A

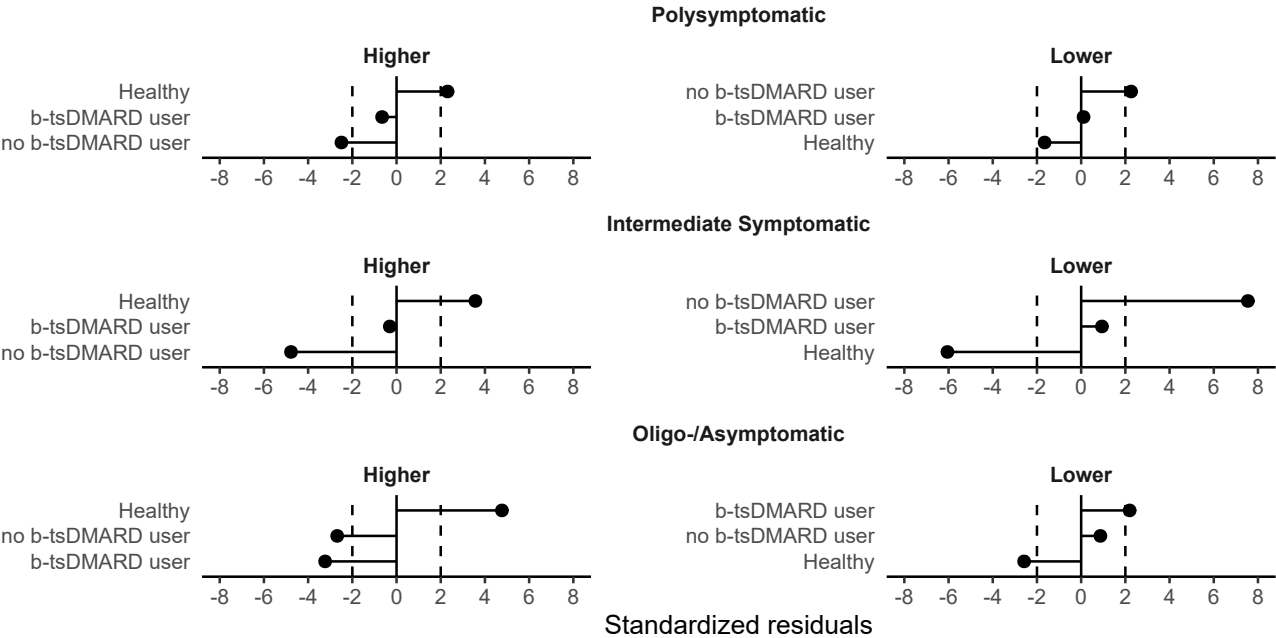

B

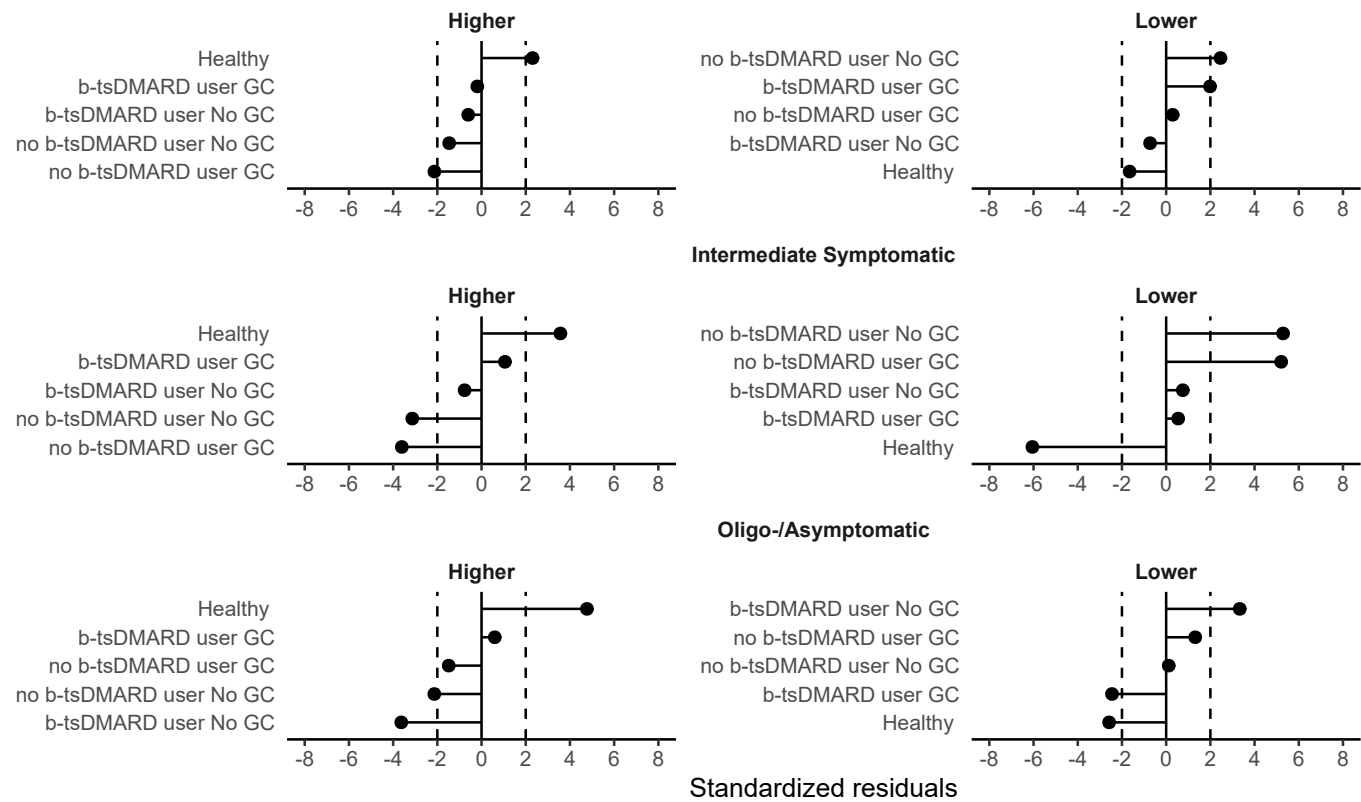

Supplement: inline-supplementary-material-6 [file inline-supplementary-material-6.pdf]

## Polysymptomatic

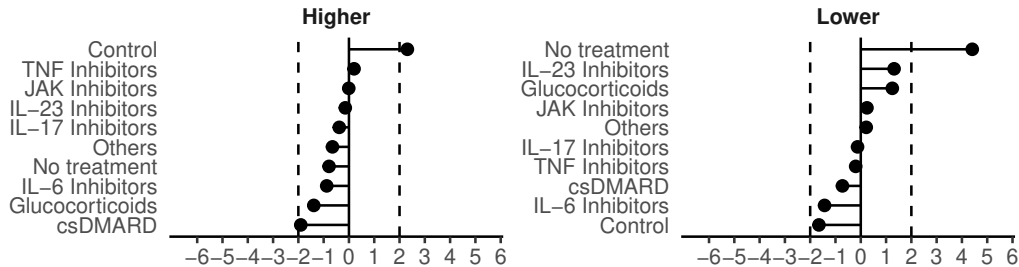

## Intermediate Symptomatic

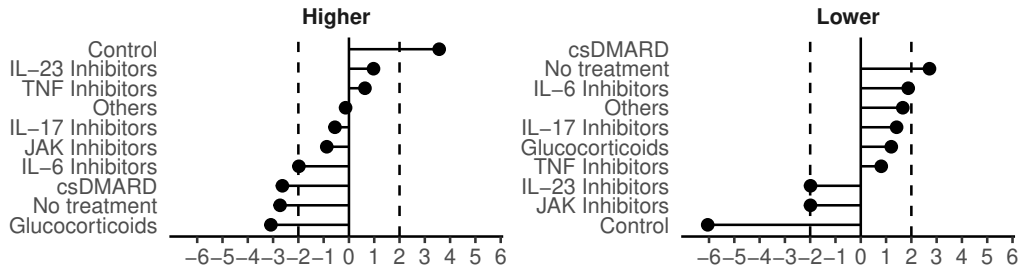

## Oligo-/Asymptomatic

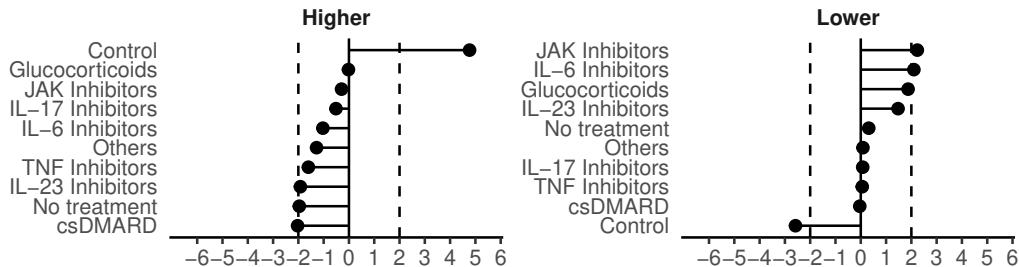

## Standardized residuals

Supplement: inline-supplementary-material-7 [file inline-supplementary-material-7.pdf]
